1 **CONVERGENT EVOLUTION OF CONSERVED MITOCHONDRIAL PATHWAYS**  
2 **UNDERLIES REPEATED ADAPTATION TO EXTREME ENVIRONMENTS**

3

4 Ryan Greenway<sup>1†</sup>, Nick Barts<sup>1†</sup>, Chaturika Henpita<sup>2†</sup>, Anthony P. Brown<sup>3</sup>, Lenin Arias Rodriguez<sup>4</sup>,  
5 Carlos M. Rodríguez Peña<sup>5</sup>, Sabine Arndt<sup>6</sup>, Gigi Y. Lau<sup>7</sup>, Michael P. Murphy<sup>6</sup>, Lei Wu<sup>8</sup>, Dingbo Lin<sup>8</sup>,  
6 Jennifer H. Shaw<sup>2,9‡</sup>, Joanna L. Kelley<sup>3‡</sup> & Michael Tobler<sup>1‡</sup>

7

8 <sup>1</sup>Division of Biology, Kansas State University, Manhattan, KS, USA

9 <sup>2</sup>Department of Integrative Biology, Oklahoma State University, Stillwater, OK, USA

10 <sup>3</sup>School of Biological Sciences, Washington State University, Pullman, WA, USA

11 <sup>4</sup>División Académica de Ciencias Biológicas, Universidad Juárez Autónoma de Tabasco,

12 Villahermosa, Tabasco, Mexico

13 <sup>5</sup>Instituto de Investigaciones Botánicas y Zoológicas, Universidad Autónoma de Santo Domingo,

14 Santo Domingo, Dominican Republic

15 <sup>6</sup>MRC Mitochondrial Biology Unit, University of Cambridge, Cambridge, United Kingdom

16 <sup>7</sup>Department of Biosciences, University of Oslo, Oslo, Norway

17 <sup>8</sup>Department of Nutritional Sciences, Oklahoma State University, Stillwater, OK, USA

18 <sup>9</sup>Current address: Department of Biomedical Sciences, PCOM South Georgia, Moultrie, GA, USA

19 <sup>†</sup>Shared first authorship

20 <sup>‡</sup>Co-corresponding authors

21

22 **Abstract**

23 Extreme environments test the limits of life. Still, some organisms thrive in harsh conditions,  
24 begging the question whether the repeated colonization of extreme environments is facilitated by  
25 predictable and repeatable evolutionary innovations. We identified the mechanistic basis underlying  
26 convergent evolution of tolerance to hydrogen sulfide (H<sub>2</sub>S)—a potent toxicant that impairs  
27 mitochondrial function—across evolutionarily independent lineages of a fish (*Poecilia mexicana*,  
28 Poeciliidae) from H<sub>2</sub>S-rich freshwater springs. We found that mitochondrial function is maintained  
29 in the presence of H<sub>2</sub>S in sulfide spring *P. mexicana*, but not ancestral lineages in adjacent nonsulfidic  
30 habitats, due to convergent adaptations in both the primary toxicity target and a major detoxification  
31 enzyme. Additionally, we show that H<sub>2</sub>S tolerance in 10 independent lineages of sulfide spring fishes  
32 across multiple genera of Poeciliidae is mediated by convergent modification and expression changes  
33 of genes associated with H<sub>2</sub>S toxicity and detoxification. Our results demonstrate that the repeated  
34 modification of highly conserved physiological pathways associated with essential mitochondrial  
35 processes enabled the colonization of novel environments.

36

37 Stephen J. Gould was a fierce proponent of the importance of contingency in evolution, famously  
38 quipping that replaying the “tape of life” would lead to different outcomes every time (1).  
39 Mitochondrial genomes were historically thought to be a prime example of such contingency  
40 evolution, because alternative genetic variants were assumed to be selectively neutral (2). This  
41 paradigm has been shifting, with mounting evidence that mitochondria—and genes encoded in the  
42 mitochondrial genome—play an important role in adaptation, especially in the context of  
43 physiochemical stress (3). However, it often remains unclear how genetic variation in mitochondrial  
44 genomes and nuclear genes that contribute to mitochondrial function translates to variation in  
45 physiological and organismal function. Furthermore, it is not known whether exposure to similar  
46 selective regimes may cause convergent modifications of mitochondrial genomes and emergent  
47 biochemical and physiological functions in evolutionarily independent lineages. Extreme  
48 environments that represent novel ecological niches are natural experiments to address questions  
49 about mechanisms underlying mitochondrial adaptations and illuminate the predictability of adaptive  
50 evolution of mitochondria. Among the most extreme freshwater ecosystems are springs with high  
51 levels of hydrogen sulfide (H<sub>2</sub>S), a potent respiratory toxicant lethal to metazoans due to its  
52 inhibition of mitochondrial ATP production (4). Multiple lineages of livebearing fishes (Poeciliidae)  
53 have colonized H<sub>2</sub>S-rich springs throughout the Americas and independently evolved tolerance to  
54 sustained H<sub>2</sub>S concentrations orders of magnitudes higher than those encountered by ancestral  
55 lineages in nonsulfidic habitats (5). Here, we identify the mechanistic basis of increased H<sub>2</sub>S  
56 tolerance—an evolutionary innovation that facilitated the independent colonization of extreme  
57 environments—and ask if the underlying mechanisms have evolved in convergence in disparate  
58 lineages of livebearing fishes.

59 H<sub>2</sub>S toxicity and detoxification are associated with highly conserved physiological pathways  
60 in mitochondria (Figure 1A) (6, 7), providing *a priori* predictions about molecular mechanisms

61 underlying adaptation to this strong source of selection. Toxic effects of H<sub>2</sub>S result from binding to  
62 and inhibition of cytochrome c oxidase (COX) in the oxidative phosphorylation (OxPhos) pathway  
63 (8). Animal cells can also detoxify low concentrations of endogenously produced H<sub>2</sub>S via the  
64 mitochondrial sulfide:quinone oxidoreductase (SQR) pathway, which is linked to OxPhos (9). We  
65 have previously shown that genes associated with both pathways are under divergent selection and  
66 differentially expressed between fish populations in sulfidic and nonsulfidic habitats (5). These  
67 include genes encoding subunits of the direct toxicity target (COX) and the enzyme mediating the  
68 first step of detoxification (SQR) (5). Tolerance to H<sub>2</sub>S may therefore be mediated by resistance  
69 (modification of toxicity targets that reduce the negative impact of H<sub>2</sub>S), regulation (modification of  
70 physiological pathways that maintain H<sub>2</sub>S homeostasis), or both (4).

71 We used a series of *in vivo* and *in vitro* assays to identify the functional consequences of  
72 modifications to the OxPhos and SQR pathways in evolutionarily independent population pairs of  
73 *P. mexicana* from adjacent sulfidic and nonsulfidic habitats (Figure S1), including analyses of the  
74 activity of relevant proteins and the physiological function of mitochondria and whole organisms. If  
75 resistance was the primary mechanism of tolerance, we predict that COX function is maintained in  
76 the presence of H<sub>2</sub>S in fish from sulfidic populations, but not those from nonsulfidic populations.  
77 Quantification of COX function indicated that enzyme activity generally declined with increasing  
78 H<sub>2</sub>S concentrations (Figure 1B). However, inhibition of COX by H<sub>2</sub>S was reduced for two *P.*  
79 *mexicana* populations from sulfidic habitats (Puy and Pich), which maintained significant COX  
80 activity even at the highest H<sub>2</sub>S concentrations. Consequently, resistance may contribute to H<sub>2</sub>S  
81 tolerance in some populations, but cannot explain the repeated evolution of H<sub>2</sub>S tolerance by itself,  
82 because COX activity in one H<sub>2</sub>S-tolerant population (Tac) declined just as in nonsulfidic  
83 populations (Figure 1B).

84 We also tested whether tolerant and intolerant populations differ in their ability to detoxify  
85 H<sub>2</sub>S by conducting enzyme activity assays of SQR. SQR activity was significantly higher in  
86 mitochondria from sulfidic populations at intermediate and high H<sub>2</sub>S concentrations (Figure 1C),  
87 likely helping fish from sulfidic habitats to maintain H<sub>2</sub>S homeostasis during environmental  
88 exposure. To test this prediction *in vivo*, we used a novel mitochondria-specific H<sub>2</sub>S-probe (MitoA)  
89 that allows for the monitoring of relative H<sub>2</sub>S levels inside the mitochondria of living organisms (10).  
90 We measured mitochondrial H<sub>2</sub>S concentrations in this manner using laboratory-reared fish that  
91 were exposed to varying levels of H<sub>2</sub>S. Mitochondrial H<sub>2</sub>S concentrations in mitochondria isolated  
92 from livers (Figure 1D) and other organs (Figure S2) of fish from nonsulfidic habitats increased  
93 above control levels at all exposure concentrations. In contrast, mitochondrial H<sub>2</sub>S concentrations in  
94 isolates of fish from sulfidic populations did not usually exceed control levels and remained lower  
95 than levels in fish from nonsulfidic habitats. Together, these results indicate that populations of *P.*  
96 *mexicana* from sulfidic habitats can detoxify H<sub>2</sub>S at higher rates and thus regulate mitochondrial H<sub>2</sub>S  
97 upon environmental exposure.

98 Modification of the OxPhos and SQR pathways in *P. mexicana* suggests that mitochondrial  
99 adaptation is key to the evolution of H<sub>2</sub>S tolerance. Therefore, mitochondrial function of fish from  
100 sulfidic habitats should be maintained upon exposure to H<sub>2</sub>S. We tested this hypothesis by  
101 quantifying different aspects of mitochondrial function (basal respiration, maximal respiration, and  
102 spare respiratory capacity) along a gradient of H<sub>2</sub>S concentrations using an *ex vivo* coupling assay. As  
103 expected, all aspects of mitochondrial function generally declined with increasing H<sub>2</sub>S (Figures 1E,  
104 S3-S5). Comparison of mitochondrial function between adjacent populations in sulfidic and  
105 nonsulfidic habitats indicated no differences in basal respiration (Figure S3). However, individuals  
106 from sulfidic populations were able to maintain maximal respiration and spare respiratory capacity at  
107 higher levels compared to individuals from nonsulfidic habitats of the same river drainage (Figure

108 1E), even though the magnitude of difference and the shape of response curves varied (Figures S4-  
109 S5). Overall, our findings indicate that mitochondria of H<sub>2</sub>S-tolerant individuals continue to produce  
110 ATP in the presence of an inhibitor that reduces mitochondrial function in ancestral lineages.

111 The independent evolution of H<sub>2</sub>S tolerance in *P. mexicana* by convergent modifications in  
112 pathways involved in toxicity and detoxification begs questions about the origin of adaptive alleles  
113 (11). At microevolutionary scales, convergence may be a consequence of the repeated assembly of  
114 related alleles into different genomic backgrounds, either through selection on standing genetic  
115 variation or introgression (12, 13). However, the epitome of convergent evolution is arguably the  
116 independent origin of adaptive mutations at the same locus that lead to consistent functional  
117 outcomes (14, 15). To identify convergence at a genomic level, we re-sequenced whole genomes of  
118 multiple *P. mexicana* individuals from sulfidic and nonsulfidic habitats. Analyzing phylogenetic  
119 relationship among *P. mexicana* populations (with *P. reticulata* as an outgroup) using 13,390,303 SNPs  
120 distributed across the genome confirmed three independent colonization events of sulfide springs  
121 and distinct evolutionary trajectories for sulfide spring populations in different drainages (Figure  
122 2A). If adaptive alleles arose separately through *de novo* mutation in each sulfide spring population,  
123 we would expect that putative adaptive alleles mirror these relationships, as previously documented  
124 for H<sub>2</sub>S-resistant alleles in mitochondrial *COX* subunits (16). However, patterns of divergence  
125 (Figure S6) and local ancestry were highly variable across the genome. Classifying local patterns of  
126 genetic similarity using a Hidden Markov Model and a Self Organising Map (17) allowed us to  
127 identify genomic regions in which ancestry patterns deviate from the genome-wide consensus,  
128 including multiple regions with a strong signal of clustering by ecotype (sulfidic *vs.* nonsulfidic  
129 populations). Such clustering by ecotype occurred in <1 % of the genome (Figure S7), but included  
130 genomic regions encoding genes associated with H<sub>2</sub>S detoxification (e.g., *ETHE1* and *SQR*; Figure  
131 2B, Table S14). Clustering by ecotype indicates a monophyletic origin of putatively adaptive alleles

132 that are shared across independent lineages of sulfide spring *P. mexicana* as a consequence of  
133 selection on standing genetic variation or introgression. Consequently, multiple mechanisms played a  
134 role in the convergent evolution of H<sub>2</sub>S-tolerance in *P. mexicana*.

135 While selection on standing genetic variation and introgression can explain convergent  
136 evolution at microevolutionary scales, adaptive alleles are unlikely to be shared among lineages at  
137 macroevolutionary scales due to high phylogenetic and geographic distances separating gene pools  
138 (18). Absence of convergence in molecular mechanisms at broader phylogenetic scales might  
139 indicate the importance of contingency in evolution, as postulated by Gould. In contrast, the  
140 presence of convergence would indicate that fundamental constraints limit the number of solutions  
141 for a functional problem (19). We used phylogenetic comparative analyses of gene expression and  
142 analyses of molecular evolution to detect patterns of molecular convergence in 10 lineages of sulfide  
143 spring poeciliids and ancestors in nonsulfidic habitats (Figure S1). This included members of five  
144 genera that span over 40 million years of divergence and occur in different biogeographic contexts  
145 (Figure S1). We found evidence for convergence in both gene expression and sequence evolution.  
146 Variation in overall gene expression was strongly influenced by phylogenetic relationships (Figure  
147 3A). However, 186 genes exhibited significant evidence for convergent expression shifts in sulfide  
148 spring fishes (Figure 3B, Table S16), segregating lineages based on habitat type of origin, irrespective  
149 of phylogenetic relationships (Figure 3C). Functional annotation indicated that genes with  
150 convergent expression shifts were enriched for biological processes associated with H<sub>2</sub>S  
151 detoxification (SQR pathway, Figure 3D), the processing of sulfur compounds, and H<sub>2</sub>S toxicity  
152 targets in OxPhos (Figure S8, Table S17). We also identified 11 genes with elevated nonsynonymous  
153 to synonymous substitution rates across the phylogeny, including three mitochondrial genes that  
154 encode subunits of H<sub>2</sub>S's toxicity target (*COX1* and *COX3*) and OxPhos complex III (*CYTB*; Table  
155 S18). Most amino acid substitutions in *COX1* and *COX3* occurred in a lineage-specific fashion, but

156 convergent substitutions across clades occurred at six codons in *COX1* and two codons in *COX3*  
157 (Figure 4).

158       Colonization of novel niches with extreme environmental conditions in poeciliids is the  
159 result of repeated and predicted modifications of the same physiological pathways, genes, and—in  
160 some instances—codons associated with mitochondrial function. This convergence at multiple  
161 levels of biological organization is likely a consequence of constraint, because the explicit  
162 biochemical and physiological consequences of H<sub>2</sub>S severely limit the ways organisms can cope with  
163 its toxicity (19). Due to these constraints, molecular convergence is not only evident at  
164 microevolutionary scales, where selection can repeatedly assemble related alleles into different  
165 genomic backgrounds, but also at macroevolutionary scales including lineages separated by over 40  
166 million years of evolution. Evolutionary novelty can consequently arise through the convergent  
167 modification of the most conserved physiological pathways, underscoring the long overlooked role  
168 of mitochondria in adaptive evolution (3).

## 169 **References**

- 170 1. S. J. Gould, *Wonderful Life: The Burgess Shale and the Nature of History*. (W. W. Norton and  
171 Company, New York, 1990).
- 172 2. J. W. O. Ballard, M. Kreitman, Is mitochondrial DNA a strictly neutral marker? *Trends in*  
173 *Ecology & Evolution* **10**, 485-488 (1995).
- 174 3. G. E. Hill, *Mitonuclear Ecology*. (Oxford University Press, Oxford, 2019).
- 175 4. M. Tobler, C. N. Passow, R. Greenway, J. L. Kelley, J. H. Shaw, The evolutionary ecology of  
176 animals inhabiting hydrogen sulfide-rich environments. *Annual Review of Ecology, Evolution and*  
177 *Systematics* **47**, 239-262 (2016).



- 178 5. M. Tobler, J. L. Kelley, M. Plath, R. Riesch, Extreme environments and the origins of  
179 biodiversity: adaptation and speciation in sulfide springs. *Molecular Ecology* **27**, 843-859 (2018).
- 180 6. M. Saraste, Oxidative phosphorylation at the fin de siècle. *Science* **283**, 1488-1493 (1999).
- 181 7. Y. Shahak, G. Hauska, in *Advances in Photosynthesis and Respiration*, R. Hell, C. Dahl, D. B. Knaff,  
182 L. T, Eds. (Springer, Heidelberg, 2008), vol. 27, pp. 319-335.
- 183 8. C. E. Cooper, G. C. Brown, The inhibition of mitochondrial cytochrome oxidase by the gases  
184 carbon monoxide, nitric oxide, hydrogen cyanide and hydrogen sulfide: chemical mechanism  
185 and physiological significance. *Journal of Bioenergy and Biomembranes* **40**, 533-539 (2008).
- 186 9. K. R. Olson, H<sub>2</sub>S and polysulfide metabolism: Conventional and unconventional pathways.  
187 *Biochemical Pharmacology* **149**, 77-90 (2018).
- 188 10. S. Arndt *et al.*, Assessment of H<sub>2</sub>S in vivo using the newly developed mitochondria-targeted  
189 mass spectrometry probe MitoA. *Journal of Biological Chemistry* **292**, 7761-7773 (2017).
- 190 11. D. L. Stern, The genetic causes of convergent evolution. *Nature Reviews Genetics* **14**, 751-764  
191 (2013).
- 192 12. F. C. Jones *et al.*, The genomic basis of adaptive evolution in threespine stickleback. *Nature*  
193 **484**, 55-61 (2012).
- 194 13. E. M. Oziolor *et al.*, Adaptive introgression enables evolutionary rescue from extreme  
195 environmental pollution. *Science* **364**, 455-457 (2019).
- 196 14. C. R. Feldman, E. D. Brodie Jr., E. D. Brodie III, M. E. Pfrender, Constraint shapes  
197 convergence in tetrodotoxin-resistant sodium channels of snakes. *Proceedings of the National*  
198 *Academy of Sciences USA* **109**, 4556-4561 (2012).
- 199 15. K. R. Elmer, A. Meyer, Adaptation in the age of genomics: insights from parallelism and  
200 convergence. *Trends in Ecology & Evolution* **26**, 298-306 (2011).

- 201 16. M. Pfenninger *et al.*, Parallel evolution of *cox* genes in H<sub>2</sub>S-tolerant fish as key adaptation to a  
202 toxic environment. *Nature Communications* **5**, 3873 (2014).
- 203 17. N. Zamani *et al.*, Unsupervised genome-wide recognition of local relationship patterns. *BMC*  
204 *Genomics* **14**, 347 (2013).
- 205 18. G. L. Conte, M. E. Arnegard, C. L. Peichel, D. Schluter, The probability of genetic parallelism  
206 and convergence in natural populations. *Proceedings of the Royal Society B* **279**, 5039-5047 (2012).
- 207 19. Z. D. Blount, R. E. Lenski, J. B. Losos, Contingency and determinism in evolution: replaying  
208 life's tape. *Science* **362**, eaam5979 (2018).

209

210 **Acknowledgements:** We thank the Centro de Investigación e Innovación para la Enseñanza y

211 Aprendizaje (CIIEA), O. Cornejo, T. Morgan, R. Rohlf, and N. Rohner for their help. **Funding:**

212 This work was supported by grants from the National Science Foundation (IOS-1463720, IOS-

213 1557795, IOS-1557860 to JHS, JLK, and MT), the US Army Research Office (W911NF-15-1-0175,

214 W911NF-16-1-0225 to JLK and MT), the Medical Research Council UK (MC\_U105663142 to

215 MPM), and by a Wellcome Trust Investigator Award (110159/Z/15/Z to MPM).

216 **Author contributions:** Conceptualization: RG, NB, CH, JHS, JLK, MT; Funding: MPM, JHS, JLK,

217 MT; Fieldwork: RG, NB, APB, LAR, CMRP, JLK, MT; Functional analyses: NB, CH, SA, GYL,

218 MPM, LW, DL, JHS, MT; Genomics and transcriptomics: RG, APB, JLK, MT; Data analysis: RG,

219 NB, CH, APB, JLK, MT; Writing original draft: RG, NB, JLK, MT; Writing, reviewing, editing: all

220 authors.

221

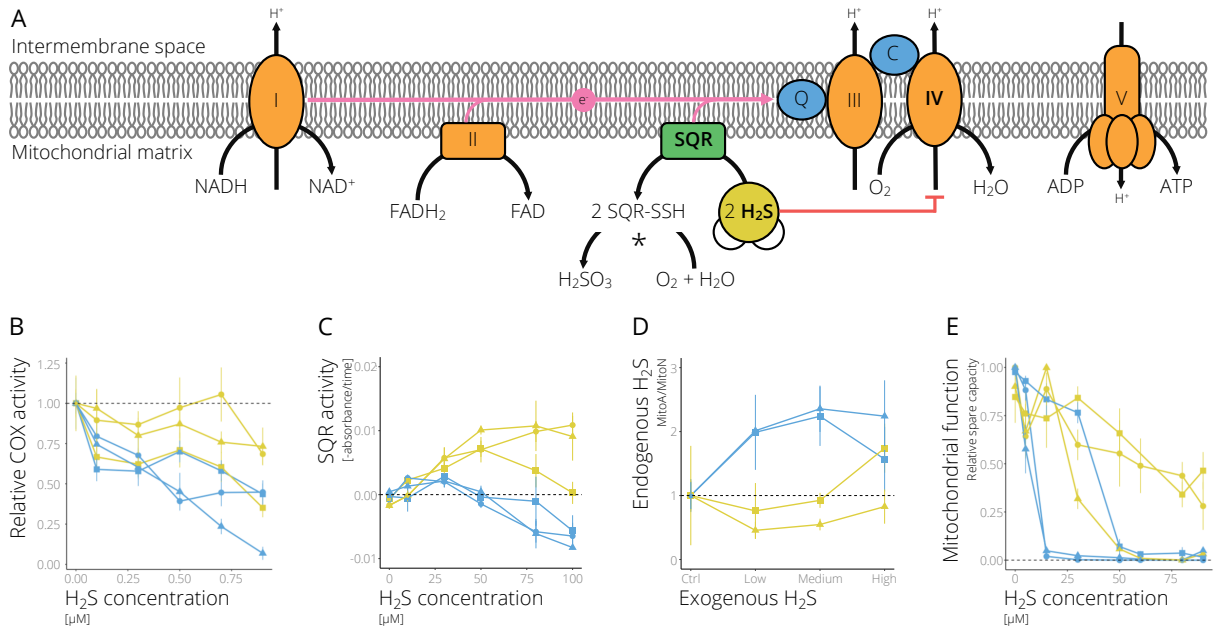

222

223 **Figure 1.A.** Physiological pathways associated with H<sub>2</sub>S toxicity and detoxification are located in the  
 224 inner mitochondrial membrane. H<sub>2</sub>S inhibits OxPhos (orange enzymes) by binding to COX  
 225 (Complex IV). H<sub>2</sub>S can be detoxified through SQR (green enzyme) and additional enzymes  
 226 (indicated by asterisks). **B.** Relative activity of COX upon H<sub>2</sub>S exposure, which was primarily  
 227 explained by an interaction between habitat type of origin and ambient H<sub>2</sub>S concentration (Tables  
 228 S2-S3). **C.** Activity of SQR as a function of H<sub>2</sub>S concentration, which was explained by an  
 229 interaction between habitat type of origin and H<sub>2</sub>S concentration (Tables S4-S5). **D.** Relative change  
 230 in mitochondrial H<sub>2</sub>S concentrations in the liver of live fish exposed to different levels of  
 231 environmental H<sub>2</sub>S. Variation in mitochondrial H<sub>2</sub>S levels were explained by habitat type of origin  
 232 and exogenous H<sub>2</sub>S concentration (Tables S6-S7). **E.** Relative spare respiratory capacity of isolated  
 233 liver mitochondria at different levels of H<sub>2</sub>S. The interaction between habitat type of origin and  
 234 drainage of origin best explained variation in spare respiratory capacity (Tables S11-S12). For all  
 235 graphs, yellow colors denote *P. mexicana* from H<sub>2</sub>S-rich habitats, blue from nonsulfidic habitats.  
 236 Symbols stand for populations from different river drainages (■: Tac; ▲: Puy; ●: Pich; see Figure  
 237 S1).

238

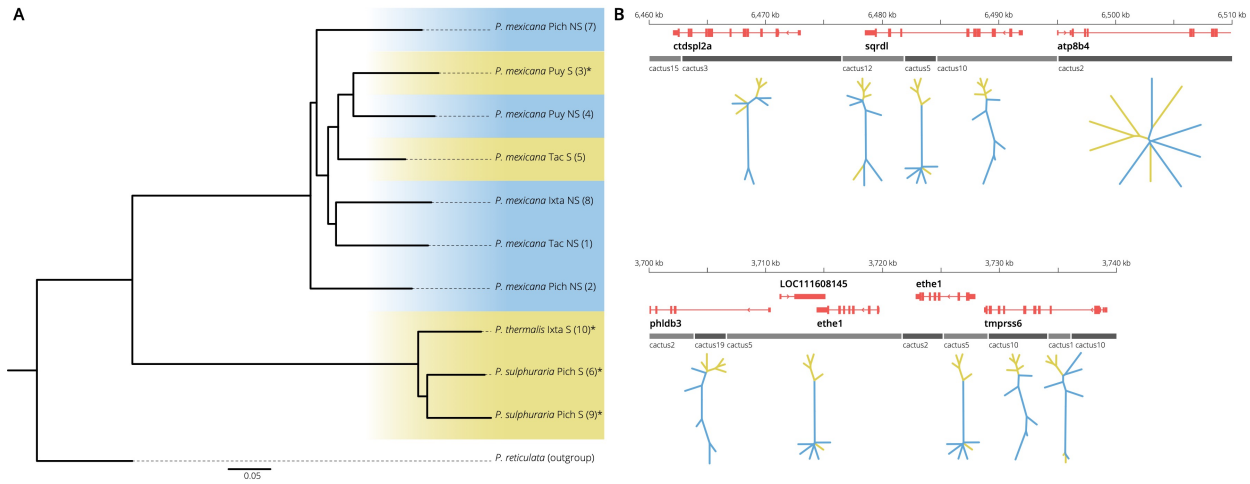

239

240 **Figure 2.A.** Phylogeny of different population in the *P. mexicana* species complex (with *P. reticulata*  
241 as an outgroup) based on genome-wide SNPs. Colors indicate nonsulfidic (blue) vs. sulfidic (yellow)  
242 lineages. **B.** Local ancestry patterns around two key genes involved in H<sub>2</sub>S detoxification, *SQR* and  
243 *ETHE1*. Gray bars represent the local ancestry pattern (cactus) associated with each region.  
244 Unrooted trees represent local ancestry relationships, with sulfidic lineages colored in yellow and  
245 nonsulfidic lineages in blue. Cacti 10 and 19 show clear clustering by ecotype. In cacti 1, 5, and 12,  
246 four of five sulfidic individuals cluster together.

247

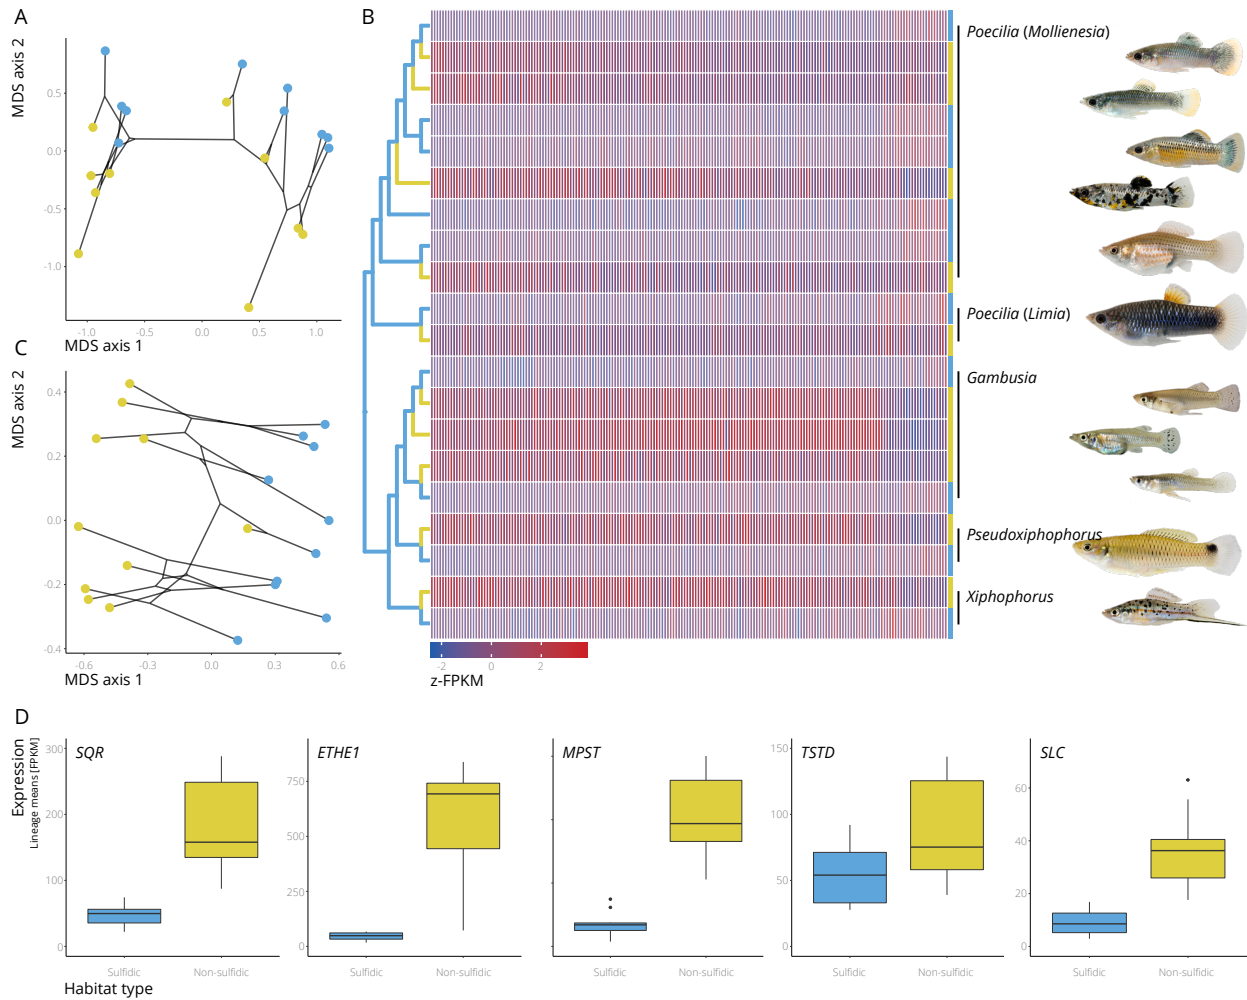

248  
 249 **Figure 3.A.** Multidimensional scaling (MDS) plot of overall gene expression patterns across 20  
 250 lineages of poeciliid fishes. Black lines represent phylogenetic relationships among lineages; color  
 251 represents habitat type of origin (yellow: sulfidic; blue: nonsulfidic). **B.** Expression variation of 186  
 252 genes with evidence for convergent expression shifts ( $\alpha$ -transformed). Colors represent expression  
 253 levels as indicated by the scale. The cladogram shows the phylogenetic relationship among lineages.  
 254 Pictures on the side are examples of sulfide spring fishes (from top to bottom): *P. mexicana* (Tac), *P.*  
 255 *mexicana* (Puy), *P. sulphuraria* (2), *P. latipinna*, *L. sulphurophila*, *G. sexradiata*, *G. eurystoma*, *G. holbrooki*, *P.*  
 256 *bimaculatus*, *X. hellerii*. **C.** MDS plot of the expression of 186 genes with evidence for convergent  
 257 expression shifts. **D.** Boxplot with mean expression levels of different components of the SQR  
 258 pathway across lineages from sulfidic (yellow) and nonsulfidic (blue) habitats.
