# CONVERGENT EVOLUTION OF CONSERVED MITOCHONDRIAL PATHWAYS UNDERLIES REPEATED ADAPTATION TO EXTREME ENVIRONMENTS

Ryan Greenway<sup>1†</sup>, Nick Barts<sup>1†</sup>, Chathurika Henpita<sup>2†</sup>, Anthony P. Brown<sup>3</sup>, Lenin Arias Rodriguez<sup>4</sup>,  
Carlos M. Rodríguez Peña<sup>5</sup>, Sabine Arndt<sup>6</sup>, Gigi Y. Lau<sup>7</sup>, Michael P. Murphy<sup>6</sup>, Lei Wu<sup>8</sup>, Dingbo Lin<sup>8</sup>,  
Jennifer H. Shaw<sup>2,9‡</sup>, Joanna L. Kelley<sup>3‡</sup> & Michael Tobler<sup>1‡</sup>

<sup>1</sup>Division of Biology, Kansas State University, Manhattan, KS, USA

<sup>2</sup>Department of Integrative Biology, Oklahoma State University, Stillwater, OK, USA

<sup>3</sup>School of Biological Sciences, Washington State University, Pullman, WA, USA

<sup>4</sup>División Académica de Ciencias Biológicas, Universidad Juárez Autónoma de Tabasco,  
Villahermosa, Tabasco, Mexico

<sup>5</sup>Instituto de Investigaciones Botánicas y Zoológicas, Universidad Autónoma de Santo Domingo,  
Santo Domingo, Dominican Republic

<sup>6</sup>MRC Mitochondrial Biology Unit, University of Cambridge, Cambridge, United Kingdom

<sup>7</sup>Department of Biosciences, University of Oslo, Oslo, Norway

<sup>8</sup>Department of Nutritional Sciences, Oklahoma State University, Stillwater, OK, USA

<sup>9</sup>Current address: Department of Biomedical Sciences, PCOM South Georgia, Moultrie, GA, USA

<sup>†</sup>Shared first authorship

<sup>‡</sup>Co-corresponding authors

## Abstract

Extreme environments test the limits of life. Still, some organisms thrive in harsh conditions, begging the question whether the repeated colonization of extreme environments is facilitated by predictable and repeatable evolutionary innovations. We identified the mechanistic basis underlying convergent evolution of tolerance to hydrogen sulfide (H<sub>2</sub>S)—a potent toxicant that impairs mitochondrial function—across evolutionarily independent lineages of a fish (*Poecilia mexicana*, Poeciliidae) from H<sub>2</sub>S-rich freshwater springs. We found that mitochondrial function is maintained in the presence of H<sub>2</sub>S in sulfide spring *P. mexicana*, but not ancestral lineages in adjacent nonsulfidic habitats, due to convergent adaptations in both the primary toxicity target and a major detoxification enzyme. Additionally, we show that H<sub>2</sub>S tolerance in 10 independent lineages of sulfide spring fishes across multiple genera of Poeciliidae is mediated by convergent modification and expression changes of genes associated with H<sub>2</sub>S toxicity and detoxification. Our results demonstrate that the repeated modification of highly conserved physiological pathways associated with essential mitochondrial processes enabled the colonization of novel environments.

Stephen J. Gould was a fierce proponent of the importance of contingency in evolution, famously quipping that replaying the “tape of life” would lead to different outcomes every time (1). Mitochondrial genomes were historically thought to be a prime example of such contingency evolution, because alternative genetic variants were assumed to be selectively neutral (2). This paradigm has been shifting, with mounting evidence that mitochondria—and genes encoded in the mitochondrial genome—play an important role in adaptation, especially in the context of physiochemical stress (3). However, it often remains unclear how genetic variation in mitochondrial genomes and nuclear genes that contribute to mitochondrial function translates to variation in physiological and organismal function. Furthermore, it is not known whether exposure to similar selective regimes may cause convergent modifications of mitochondrial genomes and emergent biochemical and physiological functions in evolutionarily independent lineages. Extreme environments that represent novel ecological niches are natural experiments to address questions about mechanisms underlying mitochondrial adaptations and illuminate the predictability of adaptive evolution of mitochondria. Among the most extreme freshwater ecosystems are springs with high levels of hydrogen sulfide ( $H_2S$ ), a potent respiratory toxicant lethal to metazoans due to its inhibition of mitochondrial ATP production (4). Multiple lineages of livebearing fishes (Poeciliidae) have colonized  $H_2S$ -rich springs throughout the Americas and independently evolved tolerance to sustained  $H_2S$  concentrations orders of magnitudes higher than those encountered by ancestral lineages in nonsulfidic habitats (5). Here, we identify the mechanistic basis of increased  $H_2S$  tolerance—an evolutionary innovation that facilitated the independent colonization of extreme environments—and ask if the underlying mechanisms have evolved in convergence in disparate lineages of livebearing fishes.

$H_2S$  toxicity and detoxification are associated with highly conserved physiological pathways in mitochondria (Figure 1A) (6, 7), providing *a priori* predictions about molecular mechanisms

underlying adaptation to this strong source of selection. Toxic effects of H<sub>2</sub>S result from binding to and inhibition of cytochrome c oxidase (COX) in the oxidative phosphorylation (OxPhos) pathway (8). Animal cells can also detoxify low concentrations of endogenously produced H<sub>2</sub>S via the mitochondrial sulfide:quinone oxidoreductase (SQR) pathway, which is linked to OxPhos (9). We have previously shown that genes associated with both pathways are under divergent selection and differentially expressed between fish populations in sulfidic and nonsulfidic habitats (5). These include genes encoding subunits of the direct toxicity target (COX) and the enzyme mediating the first step of detoxification (SQR) (5). Tolerance to H<sub>2</sub>S may therefore be mediated by resistance (modification of toxicity targets that reduce the negative impact of H<sub>2</sub>S), regulation (modification of physiological pathways that maintain H<sub>2</sub>S homeostasis), or both (4).

We used a series of *in vivo* and *in vitro* assays to identify the functional consequences of modifications to the OxPhos and SQR pathways in evolutionarily independent population pairs of *P. mexicana* from adjacent sulfidic and nonsulfidic habitats (Figure S1), including analyses of the activity of relevant proteins and the physiological function of mitochondria and whole organisms. If resistance was the primary mechanism of tolerance, we predict that COX function is maintained in the presence of H<sub>2</sub>S in fish from sulfidic populations, but not those from nonsulfidic populations. Quantification of COX function indicated that enzyme activity generally declined with increasing H<sub>2</sub>S concentrations (Figure 1B). However, inhibition of COX by H<sub>2</sub>S was reduced for two *P. mexicana* populations from sulfidic habitats (Puy and Pich), which maintained significant COX activity even at the highest H<sub>2</sub>S concentrations. Consequently, resistance may contribute to H<sub>2</sub>S tolerance in some populations, but cannot explain the repeated evolution of H<sub>2</sub>S tolerance by itself, because COX activity in one H<sub>2</sub>S-tolerant population (Tac) declined just as in nonsulfidic populations (Figure 1B).

We also tested whether tolerant and intolerant populations differ in their ability to detoxify H<sub>2</sub>S by conducting enzyme activity assays of SQR. SQR activity was significantly higher in mitochondria from sulfidic populations at intermediate and high H<sub>2</sub>S concentrations (Figure 1C), likely helping fish from sulfidic habitats to maintain H<sub>2</sub>S homeostasis during environmental exposure. To test this prediction *in vivo*, we used a novel mitochondria-specific H<sub>2</sub>S-probe (MitoA) that allows for the monitoring of relative H<sub>2</sub>S levels inside the mitochondria of living organisms (10). We measured mitochondrial H<sub>2</sub>S concentrations in this manner using laboratory-reared fish that were exposed to varying levels of H<sub>2</sub>S. Mitochondrial H<sub>2</sub>S concentrations in mitochondria isolated from livers (Figure 1D) and other organs (Figure S2) of fish from nonsulfidic habitats increased above control levels at all exposure concentrations. In contrast, mitochondrial H<sub>2</sub>S concentrations in isolates of fish from sulfidic populations did not usually exceed control levels and remained lower than levels in fish from nonsulfidic habitats. Together, these results indicate that populations of *P. mexicana* from sulfidic habitats can detoxify H<sub>2</sub>S at higher rates and thus regulate mitochondrial H<sub>2</sub>S upon environmental exposure.

Modification of the OxPhos and SQR pathways in *P. mexicana* suggests that mitochondrial adaptation is key to the evolution of H<sub>2</sub>S tolerance. Therefore, mitochondrial function of fish from sulfidic habitats should be maintained upon exposure to H<sub>2</sub>S. We tested this hypothesis by quantifying different aspects of mitochondrial function (basal respiration, maximal respiration, and spare respiratory capacity) along a gradient of H<sub>2</sub>S concentrations using an *ex vivo* coupling assay. As expected, all aspects of mitochondrial function generally declined with increasing H<sub>2</sub>S (Figures 1E, S3-S5). Comparison of mitochondrial function between adjacent populations in sulfidic and nonsulfidic habitats indicated no differences in basal respiration (Figure S3). However, individuals from sulfidic populations were able to maintain maximal respiration and spare respiratory capacity at higher levels compared to individuals from nonsulfidic habitats of the same river drainage (Figure

1E), even though the magnitude of difference and the shape of response curves varied (Figures S4-S5). Overall, our findings indicate that mitochondria of H<sub>2</sub>S-tolerant individuals continue to produce ATP in the presence of an inhibitor that reduces mitochondrial function in ancestral lineages.

The independent evolution of H<sub>2</sub>S tolerance in *P. mexicana* by convergent modifications in pathways involved in toxicity and detoxification begs questions about the origin of adaptive alleles (11). At microevolutionary scales, convergence may be a consequence of the repeated assembly of related alleles into different genomic backgrounds, either through selection on standing genetic variation or introgression (12, 13). However, the epitome of convergent evolution is arguably the independent origin of adaptive mutations at the same locus that lead to consistent functional outcomes (14, 15). To identify convergence at a genomic level, we re-sequenced whole genomes of multiple *P. mexicana* individuals from sulfidic and nonsulfidic habitats. Analyzing phylogenetic relationship among *P. mexicana* populations (with *P. reticulata* as an outgroup) using 13,390,303 SNPs distributed across the genome confirmed three independent colonization events of sulfide springs and distinct evolutionary trajectories for sulfide spring populations in different drainages (Figure 2A). If adaptive alleles arose separately through *de novo* mutation in each sulfide spring population, we would expect that putative adaptive alleles mirror these relationships, as previously documented for H<sub>2</sub>S-resistant alleles in mitochondrial COX subunits (16). However, patterns of divergence (Figure S6) and local ancestry were highly variable across the genome. Classifying local patterns of genetic similarity using a Hidden Markov Model and a Self Organising Map (17) allowed us to identify genomic regions in which ancestry patterns deviate from the genome-wide consensus, including multiple regions with a strong signal of clustering by ecotype (sulfidic *vs.* nonsulfidic populations). Such clustering by ecotype occurred in <1 % of the genome (Figure S7), but included genomic regions encoding genes associated with H<sub>2</sub>S detoxification (e.g., ETHE1 and SQR; Figure 2B, Table S14). Clustering by ecotype indicates a monophyletic origin of putatively adaptive alleles

that are shared across independent lineages of sulfide spring *P. mexicana* as a consequence of selection on standing genetic variation or introgression. Consequently, multiple mechanisms played a role in the convergent evolution of H<sub>2</sub>S-tolerance in *P. mexicana*.

While selection on standing genetic variation and introgression can explain convergent evolution at microevolutionary scales, adaptive alleles are unlikely to be shared among lineages at macroevolutionary scales due to high phylogenetic and geographic distances separating gene pools (18). Absence of convergence in molecular mechanisms at broader phylogenetic scales might indicate the importance of contingency in evolution, as postulated by Gould. In contrast, the presence of convergence would indicate that fundamental constraints limit the number of solutions for a functional problem (19). We used phylogenetic comparative analyses of gene expression and analyses of molecular evolution to detect patterns of molecular convergence in 10 lineages of sulfide spring poeciliids and ancestors in nonsulfidic habitats (Figure S1). This included members of five genera that span over 40 million years of divergence and occur in different biogeographic contexts (Figure S1). We found evidence for convergence in both gene expression and sequence evolution. Variation in overall gene expression was strongly influenced by phylogenetic relationships (Figure 3A). However, 186 genes exhibited significant evidence for convergent expression shifts in sulfide spring fishes (Figure 3B, Table S16), segregating lineages based on habitat type of origin, irrespective of phylogenetic relationships (Figure 3C). Functional annotation indicated that genes with convergent expression shifts were enriched for biological processes associated with H<sub>2</sub>S detoxification (SQR pathway, Figure 3D), the processing of sulfur compounds, and H<sub>2</sub>S toxicity targets in OxPhos (Figure S8, Table S17). We also identified 11 genes with elevated nonsynonymous to synonymous substitution rates across the phylogeny, including three mitochondrial genes that encode subunits of H<sub>2</sub>S's toxicity target (*COX1* and *COX3*) and OxPhos complex III (*CYTB*; Table S18). Most amino acid substitutions in *COX1* and *COX3* occurred in a lineage-specific fashion, but

convergent substitutions across clades occurred at six codons in *COX1* and two codons in *COX3* (Figure 4).

Colonization of novel niches with extreme environmental conditions in poeciliids is the result of repeated and predicted modifications of the same physiological pathways, genes, and—in some instances—codons associated with mitochondrial function. This convergence at multiple levels of biological organization is likely a consequence of constraint, because the explicit biochemical and physiological consequences of H<sub>2</sub>S severely limit the ways organisms can cope with its toxicity (19). Due to these constraints, molecular convergence is not only evident at microevolutionary scales, where selection can repeatedly assemble related alleles into different genomic backgrounds, but also at macroevolutionary scales including lineages separated by over 40 million years of evolution. Evolutionary novelty can consequently arise through the convergent modification of the most conserved physiological pathways, underscoring the long overlooked role of mitochondria in adaptive evolution (3).

## References

1. S. J. Gould, *Wonderful Life: The Burgess Shale and the Nature of History*. (W. W. Norton and Company, New York, 1990).
2. J. W. O. Ballard, M. Kreitman, Is mitochondrial DNA a strictly neutral marker? *Trends in Ecology & Evolution* **10**, 485-488 (1995).
3. G. E. Hill, *Mitonuclear Ecology*. (Oxford University Press, Oxford, 2019).
4. M. Tobler, C. N. Passow, R. Greenway, J. L. Kelley, J. H. Shaw, The evolutionary ecology of animals inhabiting hydrogen sulfide-rich environments. *Annual Review of Ecology, Evolution and Systematics* **47**, 239-262 (2016).



5. M. Tobler, J. L. Kelley, M. Plath, R. Riesch, Extreme environments and the origins of biodiversity: adaptation and speciation in sulfide springs. *Molecular Ecology* **27**, 843-859 (2018).
6. M. Saraste, Oxidative phosphorylation at the fin de siècle. *Science* **283**, 1488-1493 (1999).
7. Y. Shahak, G. Hauska, in *Advances in Photosynthesis and Respiration*, R. Hell, C. Dahl, D. B. Knaff, L. T, Eds. (Springer, Heidelberg, 2008), vol. 27, pp. 319-335.
8. C. E. Cooper, G. C. Brown, The inhibition of mitochondrial cytochrome oxidase by the gases carbon monoxide, nitric oxide, hydrogen cyanide and hydrogen sulfide: chemical mechanism and physiological significance. *Journal of Bioenergy and Biomembranes* **40**, 533-539 (2008).
9. K. R. Olson, H<sub>2</sub>S and polysulfide metabolism: Conventional and unconventional pathways. *Biochemical Pharmacology* **149**, 77-90 (2018).
10. S. Arndt *et al.*, Assessment of H<sub>2</sub>S in vivo using the newly developed mitochondria-targeted mass spectrometry probe MitoA. *Journal of Biological Chemistry* **292**, 7761-7773 (2017).
11. D. L. Stern, The genetic causes of convergent evolution. *Nature Reviews Genetics* **14**, 751-764 (2013).
12. F. C. Jones *et al.*, The genomic basis of adaptive evolution in threespine stickleback. *Nature* **484**, 55-61 (2012).
13. E. M. Oziolor *et al.*, Adaptive introgression enables evolutionary rescue from extreme environmental pollution. *Science* **364**, 455-457 (2019).
14. C. R. Feldman, E. D. Brodie Jr., E. D. Brodie III, M. E. Pfrender, Constraint shapes convergence in tetrodotoxin-resistant sodium channels of snakes. *Proceedings of the National Academy of Sciences USA* **109**, 4556-4561 (2012).
15. K. R. Elmer, A. Meyer, Adaptation in the age of genomics: insights from parallelism and convergence. *Trends in Ecology & Evolution* **26**, 298-306 (2011).

16. M. Pfenninger *et al.*, Parallel evolution of *cox* genes in H<sub>2</sub>S-tolerant fish as key adaptation to a toxic environment. *Nature Communications* **5**, 3873 (2014).
17. N. Zamani *et al.*, Unsupervised genome-wide recognition of local relationship patterns. *BMC Genomics* **14**, 347 (2013).
18. G. L. Conte, M. E. Arnegard, C. L. Peichel, D. Schluter, The probability of genetic parallelism and convergence in natural populations. *Proceedings of the Royal Society B* **279**, 5039-5047 (2012).
19. Z. D. Blount, R. E. Lenski, J. B. Losos, Contingency and determinism in evolution: replaying life's tape. *Science* **362**, eaam5979 (2018).

**Acknowledgements:** We thank the Centro de Investigación e Innovación para la Enseñanza y Aprendizaje (CIIEA), O. Cornejo, T. Morgan, R. Rohlf, and N. Rohner for their help. **Funding:** This work was supported by grants from the National Science Foundation (IOS-1463720, IOS-1557795, IOS-1557860 to JHS, JLK, and MT), the US Army Research Office (W911NF-15-1-0175, W911NF-16-1-0225 to JLK and MT), the Medical Research Council UK (MC\_U105663142 to MPM), and by a Wellcome Trust Investigator Award (110159/Z/15/Z to MPM).

**Author contributions:** Conceptualization: RG, NB, CH, JHS, JLK, MT; Funding: MPM, JHS, JLK, MT; Fieldwork: RG, NB, APB, LAR, CMRP, JLK, MT; Functional analyses: NB, CH, SA, GYL, MPM, LW, DL, JHS, MT; Genomics and transcriptomics: RG, APB, JLK, MT; Data analysis: RG, NB, CH, APB, JLK, MT; Writing original draft: RG, NB, JLK, MT; Writing, reviewing, editing: all authors.

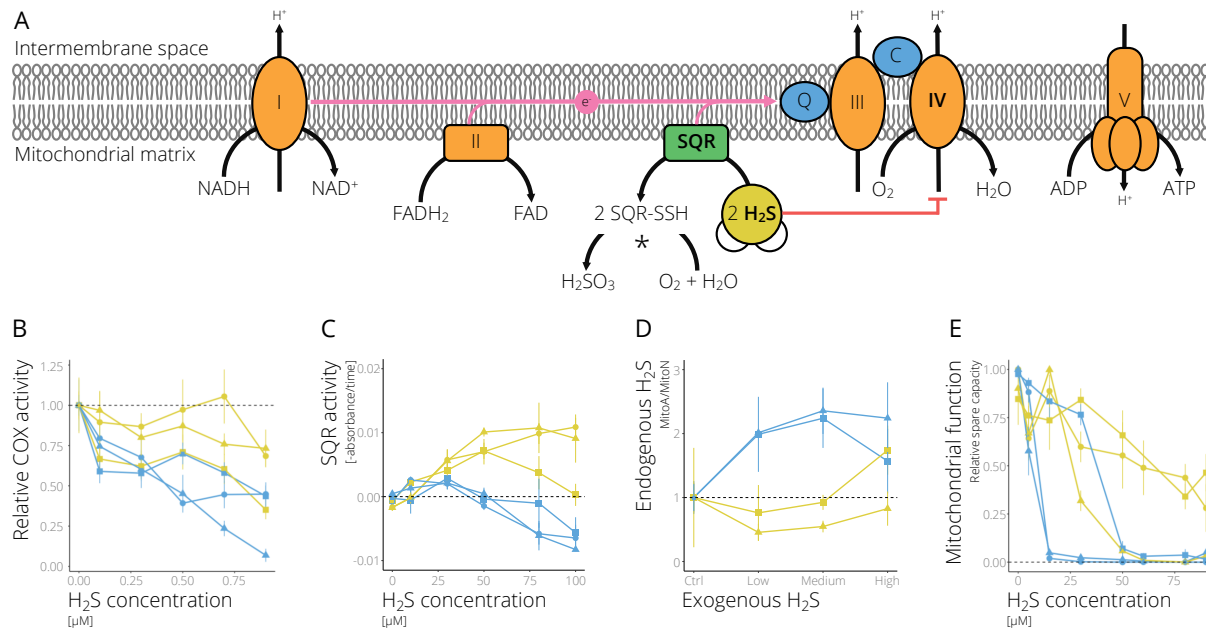

**Figure 1.A.** Physiological pathways associated with H<sub>2</sub>S toxicity and detoxification are located in the inner mitochondrial membrane. H<sub>2</sub>S inhibits OxPhos (orange enzymes) by binding to COX (Complex IV). H<sub>2</sub>S can be detoxified through SQR (green enzyme) and additional enzymes (indicated by asterisks). **B.** Relative activity of COX upon H<sub>2</sub>S exposure, which was primarily explained by an interaction between habitat type of origin and ambient H<sub>2</sub>S concentration (Tables S2-S3). **C.** Activity of SQR as a function of H<sub>2</sub>S concentration, which was explained by an interaction between habitat type of origin and H<sub>2</sub>S concentration (Tables S4-S5). **D.** Relative change in mitochondrial H<sub>2</sub>S concentrations in the liver of live fish exposed to different levels of environmental H<sub>2</sub>S. Variation in mitochondrial H<sub>2</sub>S levels were explained by habitat type of origin and exogenous H<sub>2</sub>S concentration (Tables S6-S7). **E.** Relative spare respiratory capacity of isolated liver mitochondria at different levels of H<sub>2</sub>S. The interaction between habitat type of origin and drainage of origin best explained variation in spare respiratory capacity (Tables S11-S12). For all graphs, yellow colors denote *P. mexicana* from H<sub>2</sub>S-rich habitats, blue from nonsulfidic habitats. Symbols stand for populations from different river drainages (■: Tac; ▲: Puy; ●: Pich; see Figure S1).

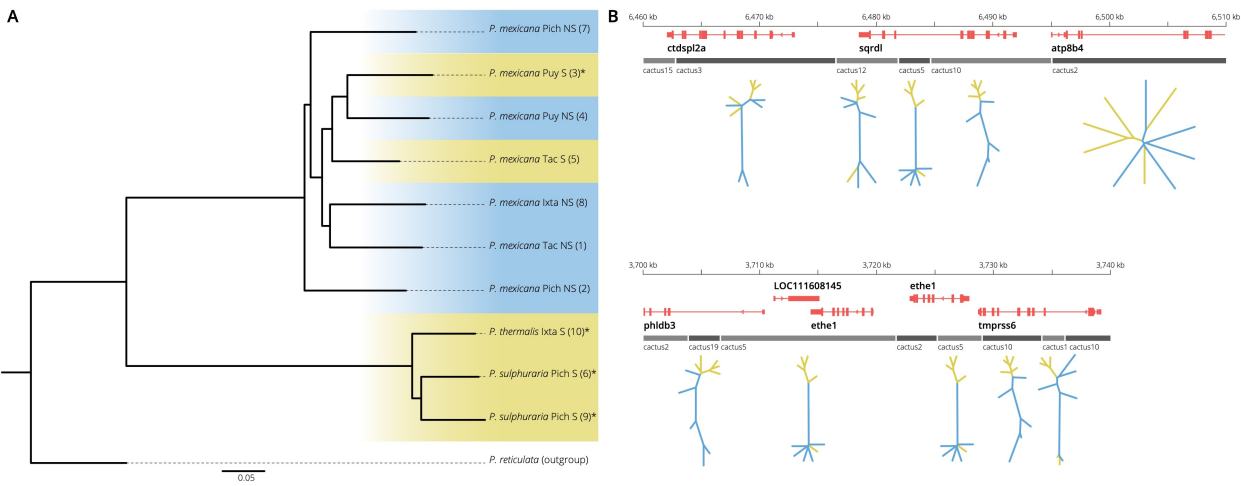

**Figure 2.A.** Phylogeny of different population in the *P. mexicana* species complex (with *P. reticulata* as an outgroup) based on genome-wide SNPs. Colors indicate nonsulfidic (blue) vs. sulfidic (yellow) lineages. **B.** Local ancestry patterns around two key genes involved in H<sub>2</sub>S detoxification, *SQR* and *ETHE1*. Gray bars represent the local ancestry pattern (cactus) associated with each region. Unrooted trees represent local ancestry relationships, with sulfidic lineages colored in yellow and nonsulfidic lineages in blue. Cacti 10 and 19 show clear clustering by ecotype. In cacti 1, 5, and 12, four of five sulfidic individuals cluster together.

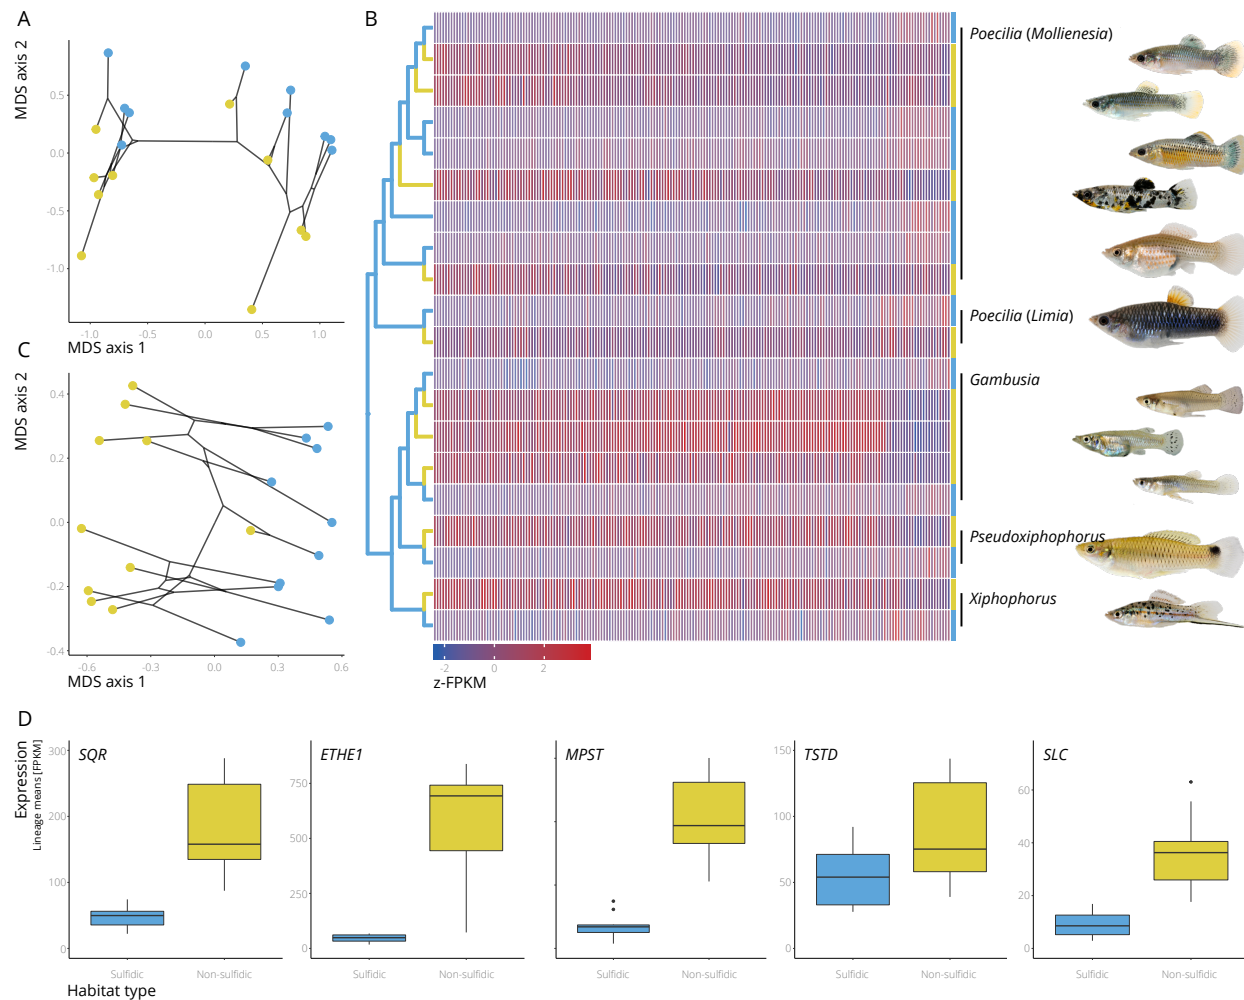

**Figure 3.A.** Multidimensional scaling (MDS) plot of overall gene expression patterns across 20 lineages of poeciliid fishes. Black lines represent phylogenetic relationships among lineages; color represents habitat type of origin (yellow: sulfidic; blue: nonsulfidic). **B.** Expression variation of 186 genes with evidence for convergent expression shifts ( $\chi$ -transformed). Colors represent expression levels as indicated by the scale. The cladogram shows the phylogenetic relationship among lineages. Pictures on the side are examples of sulfide spring fishes (from top to bottom): *P. mexicana* (Tac), *P. mexicana* (Puy), *P. sulphuraria* (2), *P. latipinna*, *L. sulphurophila*, *G. sexradiata*, *G. eurystoma*, *G. holbrooki*, *P. bimaculatus*, *X. hellerii*. **C.** MDS plot of the expression of 186 genes with evidence for convergent expression shifts. **D.** Boxplot with mean expression levels of different components of the SQR pathway across lineages from sulfidic (yellow) and nonsulfidic (blue) habitats.

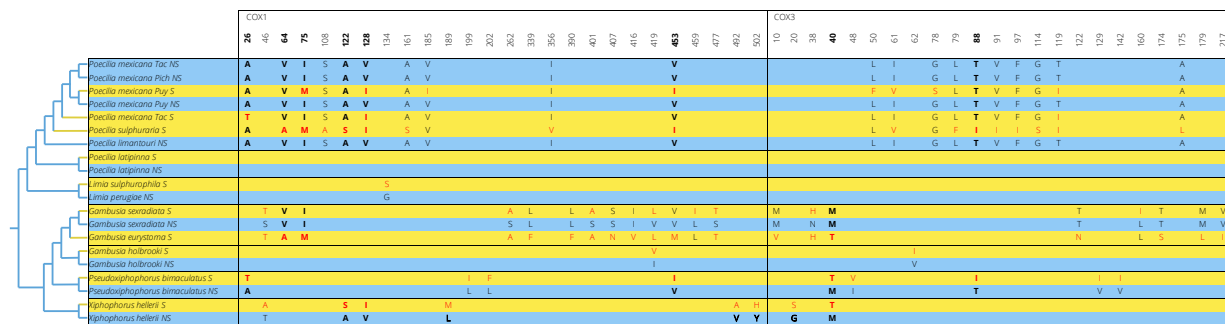

**Figure 4.** Amino acid differences in *COX1* and *COX3* between lineages from sulfidic (yellow) and nonsulfidic (blue) habitats. Derived amino acids are shown in red. Bold letters indicate codons with convergent amino acid substitutions in different clades (separated by black horizontal lines) of sulfide spring fishes.
